# Supplementary material
Source: MDPI journal article supplement (https://www.mdpi.com/2073-4441/14/4/529)
Supplement: s1 [file s1]

## Supplementary materials

### Development of solid phase extraction method based on ion imprinted polymer for determination of Cr(III) ions by ETAAS in waters

Laura Trzonkowska, Barbara Leśniewska\*, Beata Godlewska-Żyłkiewicz

Department of Analytical Chemistry, Faculty of Chemistry, University of Białystok, 15-245 Białystok, Ciołkowskiego 1K, Poland

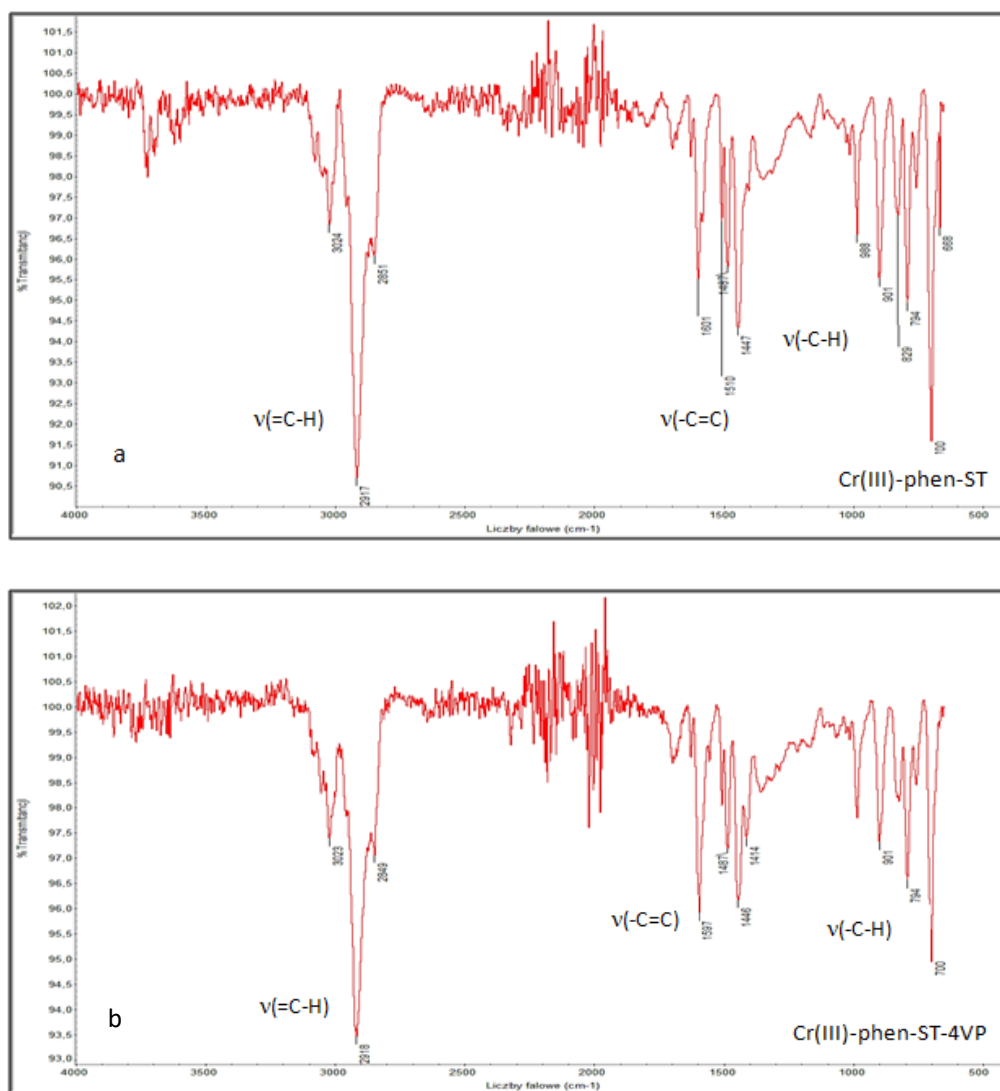

**Figure S1.** FT-IR spectra of the Cr(III)-phen-ST polymer (a) and the Cr(III)-phen-ST-4VP polymer (b).

Cr(III)-phen-ST

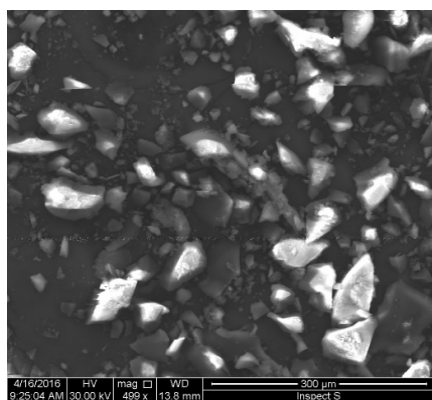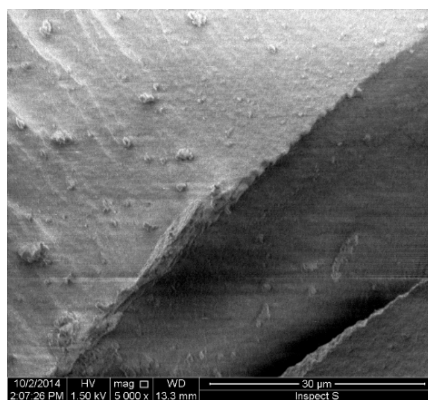

Cr(III)-phen-ST-VP

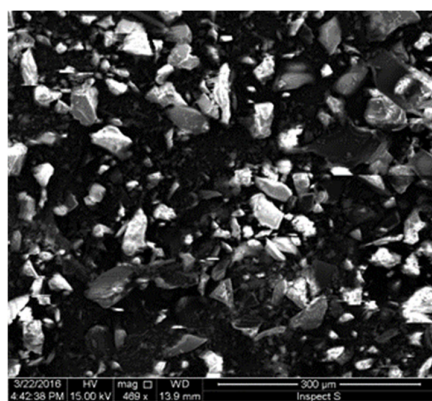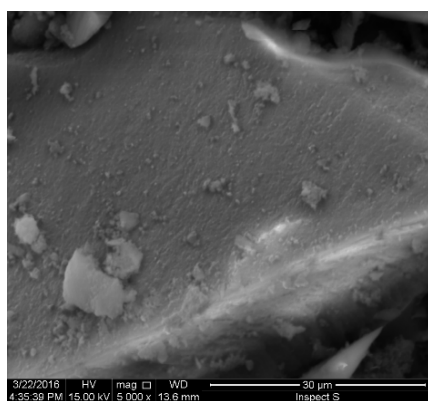

Control polymer-ST

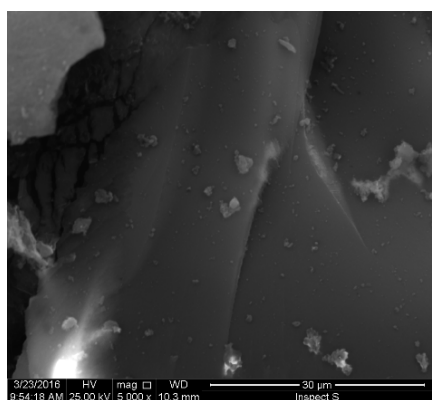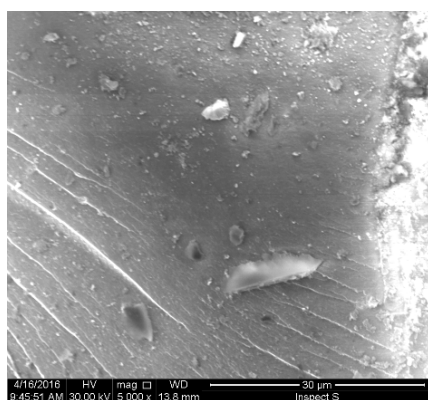

**Figure S2.** SEM images of the surface particles of the Cr(III)-phen-ST polymer, the Cr(III)-phen-ST-4VP polymer and control polymers (~500- fold and 5000-fold magnification).

**Table S1.** Efficiency of imprinting/leaching of Cr(III) from IIPs and structural parameters of the Cr(III)-phen-ST, the Cr(III)-phen-ST-4VP and control polymers determined by nitrogen adsorption-desorption isotherm.

| Polymer             | Efficiency of imprinting/leaching of Cr(III), % | BET characteristic             |                | BJH pore characteristic |                            |                             |
|---------------------|-------------------------------------------------|--------------------------------|----------------|-------------------------|----------------------------|-----------------------------|
|                     |                                                 | BET surface, m <sup>2</sup> /g | pores size, nm | size, nm                | volume, cm <sup>3</sup> /g | surface, cm <sup>2</sup> /g |
| Cr(III)-phen-ST     | 80/6                                            | 364.8                          | 1.29           | 2.12                    | 0.241                      | 452.8                       |
| CP                  |                                                 | 305.6                          | 1.30           | 2.18                    | 0.204                      | 373.0                       |
| Cr(III)-phen-ST-4VP | 70/1                                            | 177.1                          | 1.21           | 2.14                    | 0.091                      | 170.8                       |
| CP                  |                                                 | 215.6                          | 1.23           | 2.16                    | 0.117                      | 216.7                       |
